# Supplementary material for: Aquaporin-3 mediates ovarian steroid hormone-induced motility of endometrial epithelial cells
Source: PubMed Central journal article supplement (PMC6195804; doi:10.1093/humrep/dey290), 2018-10-04
Supplement: dey290_supplementary_table_si.pdf [file dey290_supplementary_table_si.pdf]

**Supplementary Table S1** Location and primer sequence information of promoter region, S1–S6 and S1(D).

| Sequence name   | Start site in the transcript                                                   | end site in the transcript | chr9 start | chr9 end | Sequence information                                                                                                                                                                                                                                                                                                                                                                                                                                                                                                                                                                                                                                                                                                                                                                                                                                                                                                                                                                                                                                                                                                                                                                                                                                                                                                                                                                                                                                                                                                                                                                                                 | Primer information                                                               |
|-----------------|--------------------------------------------------------------------------------|----------------------------|------------|----------|----------------------------------------------------------------------------------------------------------------------------------------------------------------------------------------------------------------------------------------------------------------------------------------------------------------------------------------------------------------------------------------------------------------------------------------------------------------------------------------------------------------------------------------------------------------------------------------------------------------------------------------------------------------------------------------------------------------------------------------------------------------------------------------------------------------------------------------------------------------------------------------------------------------------------------------------------------------------------------------------------------------------------------------------------------------------------------------------------------------------------------------------------------------------------------------------------------------------------------------------------------------------------------------------------------------------------------------------------------------------------------------------------------------------------------------------------------------------------------------------------------------------------------------------------------------------------------------------------------------------|----------------------------------------------------------------------------------|
| Promotor region | +50                                                                            | –2000                      | 33447560   | 33449609 | CTGGGCAACATAGCAAGACCTCATTTTTACAACAGATTTTTAAAAATTAGCTGAGTGTCATGGTGGCACATAGT CCCTATAGTCCCATCCATTCTGGA<br>GGCTGAGGTGGGAGGATCACTTGGGCCAGGAGTTCCAGGCTACAGTGAGCTGTGATTGCACCACAGCTGGGTGATGGAGCAAGACCCTA<br>CTCTTTAAAAAGAGAGAGAGGGCAAGTTGCCATGATCCCCCTCAGATAGGGCTGACTCCCCATAATTAAGTTTGCTAAAGAGGCAGA<br>CTTGCTGGGCTCAGTGGCTCAGCCTGTAATCCCAGCACTTTGGGAGGCTGAGGCGGTGGATAACTTGGTCCAGGATTCGAAATCAGCCTGG<br>TCAACATGGTGAATCCCCATCTCCAATAAAAAACAATAATTAGCTGGGCATGGTGTGACCTGTAATCCCAGCT AATCGGGAGGCTGAAGCAGG<br>AGAATCACTTGAACCTGGGAGGTGGAGTTGCAGGGAGCCGAGATCACGCCATTGCACTCCACCTAGGCCACAGAGAGAGACTCCGTC<br>TAAAAAAGAGACAGACTCTTCTTGGCTGGGGTAAAGTCAGATGGGAGAGGAGGGTTAAAAACAGCTGGGACTCAGCCTGCTGGCAAAAC<br>ATGTGGCATGTGGCATGTGGGGCAACTGCAGCTCAGCCTCTGGAGCCATGTGAGCAATGCACGCAGGTACACGTGTGACAAGCTAGGTACCTAG<br>CCATGTTCAACAGGCATGTGCACAGCCACGAGGAATGCCAGCCGTACAATTAGGCACACAGGACATCCGCCATGTGTAGACACAGCTGTGGAC<br>ATAGCTGGCCAGGACATGCGACACACGACGTGCTCATAGCACAGGGAGAAGGGCCCATGAAGTCTGGTTGGAACCTCAGCACGTG<br>TGCTGTGTGCCACCTGAGTCTGGACTGCTGCCCTCTGACACTAGCTGTCCCCTTGAAGGTCGGTGCCTTATCTGCTGACAGAAGAGACA<br>GTGTTGCTTCTCACTTGGGGCTCGCAGCCTCCTCCTCCTCGCTCGAACTGAGGATCTGTTGGTCCAGTCATCCTGGAGAGATGCGGCC<br>AGTTTCTTCTGACAGGTCTCCTCCTGCCGCAAGGAAGTGGGTGATCACAGGGCGCAGGTGGTCTCTATGACAGCTGCATCCTCCAGCCATGG<br>CCCTGAACCCTGCCTATAATCCACCATTGGCTCTCAGATCTGCCTAAGCCTCTCAGCCCCCTTACGCTCCCCTCCCTAAGCGCCCTCC<br>GAAGGCCACCCGTCCCTCAAAGTCTCTCAGCTCCATGCCCGCAGCTCCCTCACCCGGCTCCGCACCCAGCTCCAGCCGAGGT<br>GGGGCGGGGGAGGGGGCGGCACCTCCTCGGCTCCGGGACTGCAGGGCG GGGCTGCAGGGCGGGGGCCCGTGTCTCCAGCG<br>CTCCTATAAAGGGAGCCACAGCGCTGGAGGCCGTGCTCGCTGCCCAACCCCTCCCGCACCCCTC |                                                                                  |
| S1              | +22                                                                            | –245                       | 33447588   | 33447854 | CTCGTCGCCGGAGGTCGCGACCACCGAGGAAATATCCTCGCGACCTCTGTGCCCG<br>GGG CGGGCGGGACGTGGGGCGGGACGTGAGGCTCGCGGCTCCTCACGCGCGG<br>GGGAGCGGGGGGGGTGGAGCCGACCTCCGACCACGCTGCGGCCACCTCCC<br>TCGACGCCCGTACCTCACACTCCTGAAACTCCTGCCACCCGGAAGCTCCCGCGA<br>ATCCCTCCCCTGCAAGTCCCGGACTCTCCGAATCCGTCTAGA                                                                                                                                                                                                                                                                                                                                                                                                                                                                                                                                                                                                                                                                                                                                                                                                                                                                                                                                                                                                                                                                                                                                                                                                                                                                                                                                       | Forward primer TCCATGCCCGCAGCTCCCTCCA<br>Reverse primer CTCCAGCGCTGGTGGCTCCCTTTA |
| S2              | –442                                                                           | –615                       | 33448054   | 33448226 | CGCTCGGGTTCACCTTCGTTGTGACAGAGAAGACAGTCTGTCTATTCCGTGGT<br>GGGAAGTCCCCTGTCGATCACAGTCTCCCCGTCGTGAGTCTGAGTCCACCCGTGT<br>GTCTGTGTGACGACTCAAGTGGTCTGAAGTACCCGGGAAGAGGGACAGTACTCG                                                                                                                                                                                                                                                                                                                                                                                                                                                                                                                                                                                                                                                                                                                                                                                                                                                                                                                                                                                                                                                                                                                                                                                                                                                                                                                                                                                                                                           | Forward primer CCAGGACATGCGACACACGA<br>Reverse primer AGCCCCAAGTGAAGCAAC         |
| S3              | –1211                                                                          | –1416                      | 33448382   | 33448503 | ACGCACGTAACGAGTGTACCGAGGTCCTCGACTCGACGTCAACGGGGCTGTACGGTG<br>TACGGTGTACAACCGGTCGTCGACTCAGGGTCGACAAAAATTGGGAGAGGAGGG<br>TAGACTGA                                                                                                                                                                                                                                                                                                                                                                                                                                                                                                                                                                                                                                                                                                                                                                                                                                                                                                                                                                                                                                                                                                                                                                                                                                                                                                                                                                                                                                                                                      | Forward primer AGACTTTCCTTGGTGGG<br>Reverse primer ACCTGCGTGCATTGCTCAC           |
| S4              | –1214                                                                          | –1439                      | 33448825   | 33449050 | CAGACGGAGAAATTCGTTTGAATTAATACCCCTCAGTCGGGATAGACTCCCCCTAGTAC<br>CCTGTTGGAACGGGAGAGAGAGAAAAATTTCTATCCAGAACGAGGTAGTGGTCCGA<br>CACCACGTTAGTGTGAGTGACATCGGAGCTTGAGGACCCGGGTTCACTAGGAGGGT<br>GGAGTCGGAGGCTTACCTACCTGATATCCCTGATACACGGTGGTACTG                                                                                                                                                                                                                                                                                                                                                                                                                                                                                                                                                                                                                                                                                                                                                                                                                                                                                                                                                                                                                                                                                                                                                                                                                                                                                                                                                                              | Forward primer GTCATGGTGGCACATAGTC<br>Reverse primer GTCTGCCTTTAAGCAAAT          |
| S5              | –1426                                                                          | –1599                      | 33449037   | 33449210 | ACACGGTGTACTGTGAGTGCATAAAAATTTTTAGACAACATTTTTACTCCAGAACGAT<br>ACAACGGTCCAATCAGAGTTTGGAGACCGAAATTTGCTAGGAGGGTGAGCCGGAGG<br>GCTTACGTTGGAACGGGAGATACGACGAAAAATTTGTTCTTTGTAGACCACCG                                                                                                                                                                                                                                                                                                                                                                                                                                                                                                                                                                                                                                                                                                                                                                                                                                                                                                                                                                                                                                                                                                                                                                                                                                                                                                                                                                                                                                      | Forward primer GCCACCAGATGTTTCCTTG<br>Reverse primer TGTGCCACCATGACACTCA         |
| S6              | –1569                                                                          | –1690                      | 33449208   | 33449301 | CCGACCCCTCGTTTGTGTACGGAAATCCGACTCGAAGATACCGTCTGAACGGTCT<br>CCTCTAGTTTCTTTAGTAAAAGGCTCCCTGAATTAGG                                                                                                                                                                                                                                                                                                                                                                                                                                                                                                                                                                                                                                                                                                                                                                                                                                                                                                                                                                                                                                                                                                                                                                                                                                                                                                                                                                                                                                                                                                                     | Forward primer TCCTCAGGGTCATTAGCCCA<br>Reverse primer CTGGGACAAAACATGCC          |
| S1 (D)          | 'CTGCAGGGCGGGCGGGGCG<br>CCGTGTCTCCAGCCTCC<br>TATAAAGGGAGCCA' was deleted in S1 |                            |            |          | CTCGTCGCCGGAGGTCGCGACCAGGGCGGGACGTGAGGCTCGCGGCTCCTCACGCG<br>CGGGGAGCGGGGGGGTGGAGCCGACCTCCGACCAGCCTCGGGCCACTCC<br>TCGACGCCCGTACCTCACACTCCTGAAACTCCTGCCACCCGGAAGCTCCCGCAATCCCT<br>CCCCTGCAAGTCCCGGACTCTCCGAATCCGTCTAGA                                                                                                                                                                                                                                                                                                                                                                                                                                                                                                                                                                                                                                                                                                                                                                                                                                                                                                                                                                                                                                                                                                                                                                                                                                                                                                                                                                                                 | supply by Gene Pharma company, Shanghai, China                                   |
