# Supplementary material for: Aquaporin-3 mediates ovarian steroid hormone-induced motility of endometrial epithelial cells
Source: PubMed Central journal article supplement (PMC6195804; doi:10.1093/humrep/dey290), 2018-10-04
Supplement: dey290_supplementary_table_sii.pdf [file dey290_supplementary_table_sii.pdf]

**Supplementary Table SII Antibody information.**

| <b>Antibody</b>     | <b>Company</b>            | <b>Catalog number</b> | <b>Species reactivity</b>          | <b>Source</b> | <b>WB concentration (µg/ml)</b> | <b>IHC concentration (µg/ml)</b> | <b>IF concentration (µg/ml)</b> | <b>IP concentration (µg/ml)</b> |
|---------------------|---------------------------|-----------------------|------------------------------------|---------------|---------------------------------|----------------------------------|---------------------------------|---------------------------------|
| Anti-aquaporin 3    | Abcam                     | ab125219              | Mouse, rat, human                  | Rabbit        | 1                               | 5                                | 5                               |                                 |
| Anti-aquaporin 3    | Snata                     |                       |                                    | Goat          | 1                               | 5                                | 5                               |                                 |
| Ezrin antibody      | Cell Signaling Technology | #3145                 | Human, mouse, rat, monkey, bovine  | Rabbit        | 1                               |                                  | 10                              | 20                              |
| E-cadherin antibody | Proteintech               | 20874-1-AP            | Human, mouse, rat                  | Rabbit        | 1                               |                                  |                                 |                                 |
| N-cadherin antibody | Proteintech               | 22018-1-AP            | Human, mouse, rat, Gekko japonicus | Rabbit        | 1                               |                                  |                                 |                                 |
| F-actin antibody    | Abcam                     | ab205                 | Mouse, rat, rabbit, human          | Mouse         | 1                               |                                  |                                 |                                 |
| β-Tubulin           | Proteintech               | 10094-1-AP            | Human, mouse, rat, hamsters        | Rabbit        | 1                               |                                  |                                 |                                 |
